# Supplementary material
Source: HighWire-hosted journal article supplement (https://www.rcpjournals.org/highwire/filestream/9826/field_highwire_adjunct_files/1/Quraishi_Supplementary_S2_study_form.pdf)

## Supplementary material S2: CiP study forms

---

### CiP Study Trainee Self-Assessment Form

**FOR USE IN PATHFINDER ONLY**

|                                     |  |
|-------------------------------------|--|
| <b>Trainee Name</b>                 |  |
| <b>Trainee GMC number</b>           |  |
| <b>Specialty Training Programme</b> |  |
| <b>Specialty (IF CMT)</b>           |  |
| <b>Trainee Post Year</b>            |  |
| <b>Educational Supervisor Name</b>  |  |

#### Guidance notes

This form should be used to make a self-assessment on your progress against the 14 internal medicine competencies in practice (CiPs) that we expect all doctors to have demonstrated and be 'trusted' to be able to undertake by the time they complete their CCT. You should record the level you believe you are performing at for each of the 14 CiPs and explain why you have given yourself this rating. Please note there are separate descriptors for the clinical CiPs (1-9) and non-clinical CiPs (10-14).

Please refer to the participant guidance and supporting materials for details, including when each level is likely to be achieved for a CiP.

---

### CiPs 1-9

CiPs 1-9 are clinical in nature and the following level descriptors apply:

- Level 1: Observations of the activity – no execution (expected at Foundation level)
- Level 2: Trusted to act with direct supervision
- Level 3: Trusted to act with supervision available quickly
- Level 4: Trusted to act unsupervised (with clinical oversight within training)

#### 1. Managing an acute unselected take

- demonstrates behaviour appropriately with regard to patients
- demonstrates behaviour appropriately with regard to clinical and other professional colleagues
- demonstrates effective consultation skills including challenging circumstances
- demonstrates ability to negotiate shared decision making
- demonstrates effective clinical leadership
- accurate diagnosis of patients presenting on an acute unselected take over a standard shift
- appropriate management of acute problems in patients presenting on an acute unselected take over a standard shift

|                                                                                                                                                                                                                                                                                                                                                                                                                                                                                                                                                                                                                                                                                                                                                                                                                        |         |         |         |              |
|------------------------------------------------------------------------------------------------------------------------------------------------------------------------------------------------------------------------------------------------------------------------------------------------------------------------------------------------------------------------------------------------------------------------------------------------------------------------------------------------------------------------------------------------------------------------------------------------------------------------------------------------------------------------------------------------------------------------------------------------------------------------------------------------------------------------|---------|---------|---------|--------------|
| ○ appropriate liaison with specialty services when required                                                                                                                                                                                                                                                                                                                                                                                                                                                                                                                                                                                                                                                                                                                                                            |         |         |         |              |
| <b>Level achieved</b>                                                                                                                                                                                                                                                                                                                                                                                                                                                                                                                                                                                                                                                                                                                                                                                                  | Level 2 | Level 3 | Level 4 | Not observed |
| Please comment on why you have given yourself this rating                                                                                                                                                                                                                                                                                                                                                                                                                                                                                                                                                                                                                                                                                                                                                              |         |         |         |              |
| <b>2. Managing an acute specialty-related take</b>                                                                                                                                                                                                                                                                                                                                                                                                                                                                                                                                                                                                                                                                                                                                                                     |         |         |         |              |
| <ul style="list-style-type: none"> <li>• demonstrates behaviour appropriately with regard to patients</li> <li>• demonstrates behaviour appropriately with regard to clinical and other professional colleagues</li> <li>• demonstrates effective consultation skills including challenging circumstances</li> <li>• demonstrates ability to negotiate shared decision making</li> <li>• demonstrates effective clinical leadership</li> <li>• appropriate continuing management of acute medical illness in patients admitted to hospital on an acute unselected take or selected take</li> </ul>                                                                                                                                                                                                                     |         |         |         |              |
| Level achieved                                                                                                                                                                                                                                                                                                                                                                                                                                                                                                                                                                                                                                                                                                                                                                                                         | Level 2 | Level 3 | Level 4 | Not observed |
| Please comment on why you have given yourself this rating                                                                                                                                                                                                                                                                                                                                                                                                                                                                                                                                                                                                                                                                                                                                                              |         |         |         |              |
| <b>3. Providing continuity of care to medical inpatients</b>                                                                                                                                                                                                                                                                                                                                                                                                                                                                                                                                                                                                                                                                                                                                                           |         |         |         |              |
| <ul style="list-style-type: none"> <li>• demonstrates behaviour appropriately with regard to patients</li> <li>• demonstrates behaviour appropriately with regard to clinical and other professional colleagues</li> <li>• demonstrates effective consultation skills including challenging circumstances</li> <li>• identifies and manages barriers to communication (eg cognitive impairment, speech and hearing problems, capacity issues)</li> <li>• demonstrates ability to negotiate shared decision making</li> <li>• appropriate liaison with other specialty services when required</li> <li>• appropriate management of comorbidities in medical inpatients (unselected take, selected acute take or specialty admissions)</li> <li>• demonstrates awareness of the quality of patient experience</li> </ul> |         |         |         |              |
| Level achieved                                                                                                                                                                                                                                                                                                                                                                                                                                                                                                                                                                                                                                                                                                                                                                                                         | Level 2 | Level 3 | Level 4 | Not observed |
| Please comment on why you have given yourself this rating                                                                                                                                                                                                                                                                                                                                                                                                                                                                                                                                                                                                                                                                                                                                                              |         |         |         |              |

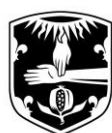

|                                                                                                                                                                                                                                                                                                                                                                                                                                                                                                                                                                                                                                                                                                                 |         |         |         |              |
|-----------------------------------------------------------------------------------------------------------------------------------------------------------------------------------------------------------------------------------------------------------------------------------------------------------------------------------------------------------------------------------------------------------------------------------------------------------------------------------------------------------------------------------------------------------------------------------------------------------------------------------------------------------------------------------------------------------------|---------|---------|---------|--------------|
|                                                                                                                                                                                                                                                                                                                                                                                                                                                                                                                                                                                                                                                                                                                 |         |         |         |              |
| <b>4. Managing outpatients with long term conditions</b>                                                                                                                                                                                                                                                                                                                                                                                                                                                                                                                                                                                                                                                        |         |         |         |              |
| <ul style="list-style-type: none"> <li>• demonstrates behaviour appropriately with regard to patients</li> <li>• demonstrates behaviour appropriately with regard to clinical and other professional colleagues</li> <li>• demonstrates effective consultation skills including challenging circumstances</li> <li>• accurate diagnosis and appropriate comprehensive management of patients referred to an outpatient clinic, ambulatory or community setting</li> <li>• appropriate management of comorbidities in an outpatient clinic</li> <li>• appropriate management of comorbidities in ambulatory or community setting</li> </ul>                                                                      |         |         |         |              |
| Level achieved                                                                                                                                                                                                                                                                                                                                                                                                                                                                                                                                                                                                                                                                                                  | Level 2 | Level 3 | Level 4 | Not observed |
| Please comment on why you have given yourself this rating                                                                                                                                                                                                                                                                                                                                                                                                                                                                                                                                                                                                                                                       |         |         |         |              |
|                                                                                                                                                                                                                                                                                                                                                                                                                                                                                                                                                                                                                                                                                                                 |         |         |         |              |
| <b>5. Managing medical problems in patients in other specialties and special cases</b>                                                                                                                                                                                                                                                                                                                                                                                                                                                                                                                                                                                                                          |         |         |         |              |
| <ul style="list-style-type: none"> <li>• demonstrates effective consultation skills including challenging circumstances</li> <li>• management of medical problems in inpatients under the care of other specialties</li> <li>• appropriate and timely liaison with other medical specialty services when required</li> </ul>                                                                                                                                                                                                                                                                                                                                                                                    |         |         |         |              |
| Level achieved                                                                                                                                                                                                                                                                                                                                                                                                                                                                                                                                                                                                                                                                                                  | Level 2 | Level 3 | Level 4 | Not observed |
| Please comment on why you have given yourself this rating                                                                                                                                                                                                                                                                                                                                                                                                                                                                                                                                                                                                                                                       |         |         |         |              |
|                                                                                                                                                                                                                                                                                                                                                                                                                                                                                                                                                                                                                                                                                                                 |         |         |         |              |
| <b>6. Managing an MDT including discharge planning</b>                                                                                                                                                                                                                                                                                                                                                                                                                                                                                                                                                                                                                                                          |         |         |         |              |
| <ul style="list-style-type: none"> <li>• demonstrates behaviour appropriately with regard to patients</li> <li>• demonstrates behaviour appropriately with regard to clinical and other professional colleagues</li> <li>• demonstrates effective consultation skills including challenging circumstances</li> <li>• demonstrates effective clinical leadership</li> <li>• demonstrates ability to work well in a multi-disciplinary team, in all relevant roles</li> <li>• Effectively estimates length of stay</li> <li>• Identifies appropriate discharge plan</li> <li>• Recognise the importance of prompt and accurate information sharing with primary care team following hospital discharge</li> </ul> |         |         |         |              |
| Level achieved                                                                                                                                                                                                                                                                                                                                                                                                                                                                                                                                                                                                                                                                                                  | Level 2 | Level 3 | Level 4 | Not observed |

Please comment on why you have given yourself this rating

## 7. Delivering effective resuscitation and managing the deteriorating patient

- competence in assessment and resuscitation
- able to promptly assess the acutely deteriorating patient, including those who are shocked or unconscious
- effective participation in decision making with regard to resuscitation decisions

|                |         |         |         |              |
|----------------|---------|---------|---------|--------------|
| Level achieved | Level 2 | Level 3 | Level 4 | Not observed |
|----------------|---------|---------|---------|--------------|

Please comment on why you have given yourself this rating

## 8. Managing end of life and palliative care skills

- demonstrates behaviour appropriately with regard to patients
- demonstrates behaviour appropriately with regard to clinical and other professional colleagues
- demonstrates effective consultation skills including challenging circumstances
- delivers appropriate palliative care and end of life care

|                |         |         |         |              |
|----------------|---------|---------|---------|--------------|
| Level achieved | Level 2 | Level 3 | Level 4 | Not observed |
|----------------|---------|---------|---------|--------------|

Please comment on why you have given yourself this rating

## 9. Achieving procedural skills

- For procedures appropriate to the stage of training as defined in the CMT or GIM curriculum:
- Able to outline the indications for the procedures and take consent
  - Evidence of aseptic technique and safe use of analgesia and local anaesthetics
  - Evidence of safe learning in clinical skills lab/simulation before performing procedures clinically

|                |         |         |         |              |
|----------------|---------|---------|---------|--------------|
| Level achieved | Level 2 | Level 3 | Level 4 | Not observed |
|----------------|---------|---------|---------|--------------|

Please comment on why you have given yourself this rating

## CiPs 10-14

CiPs 10-14 are non- clinical in nature and the following level descriptors apply:

- Level 1: No or limited knowledge or experience (expected at Foundation level)
- Level 2: Knowledge but limited experience, trusted to act with direct supervision
- Level 3: Knowledge and experience, trusted to act with guidance available
- Level 4: Experienced and trusted to level of independent practice

|                                                                                                                                                                                                                                                                                                                                                                                                                                                                                                                                                                                                          |         |         |         |              |
|----------------------------------------------------------------------------------------------------------------------------------------------------------------------------------------------------------------------------------------------------------------------------------------------------------------------------------------------------------------------------------------------------------------------------------------------------------------------------------------------------------------------------------------------------------------------------------------------------------|---------|---------|---------|--------------|
| <b>10. Delivering effective quality improvement in patient care</b>                                                                                                                                                                                                                                                                                                                                                                                                                                                                                                                                      |         |         |         |              |
| <ul style="list-style-type: none"> <li>• raises concerns including errors, serious incidents and adverse events (including 'never events')</li> <li>• shares good practice appropriately</li> <li>• demonstrates the delivery of quality improvement</li> </ul>                                                                                                                                                                                                                                                                                                                                          |         |         |         |              |
| Level achieved                                                                                                                                                                                                                                                                                                                                                                                                                                                                                                                                                                                           | Level 2 | Level 3 | Level 4 | Not observed |
| Please comment on why you have given yourself this rating                                                                                                                                                                                                                                                                                                                                                                                                                                                                                                                                                |         |         |         |              |
| <b>11. Carrying out research and managing data appropriately</b>                                                                                                                                                                                                                                                                                                                                                                                                                                                                                                                                         |         |         |         |              |
| <ul style="list-style-type: none"> <li>• demonstrates behaviour appropriately with regard to managing clinical information/data</li> <li>• demonstrates understanding of principles of research and academic writing</li> <li>• demonstrates ability to carry out critical appraisal of the literature</li> <li>• understanding of public health epidemiology and global health patterns</li> <li>• Follows guidelines on ethical conduct in research and consent for research</li> </ul>                                                                                                                |         |         |         |              |
| Level achieved                                                                                                                                                                                                                                                                                                                                                                                                                                                                                                                                                                                           | Level 2 | Level 3 | Level 4 | Not observed |
| Please comment on why you have given yourself this rating                                                                                                                                                                                                                                                                                                                                                                                                                                                                                                                                                |         |         |         |              |
| <b>12. Acting as a clinical teacher and clinical supervisor</b>                                                                                                                                                                                                                                                                                                                                                                                                                                                                                                                                          |         |         |         |              |
| <ul style="list-style-type: none"> <li>• ability and experience of teaching and training medical students, junior doctors and other health care professionals including: delivering teaching and training sessions, effective assessment of performance and giving effective feedback</li> <li>• able to supervise less experienced trainees in their clinical assessment and management of patients</li> <li>• able to supervise less experienced trainees in carrying out appropriate practical procedures</li> <li>• able to act a Clinical Supervisor to the standard required by the GMC</li> </ul> |         |         |         |              |



|                                                                                                                                                                                                                                                                                                                                                                                                                                                                  |         |         |             |              |
|------------------------------------------------------------------------------------------------------------------------------------------------------------------------------------------------------------------------------------------------------------------------------------------------------------------------------------------------------------------------------------------------------------------------------------------------------------------|---------|---------|-------------|--------------|
| Level achieved                                                                                                                                                                                                                                                                                                                                                                                                                                                   | Level 2 | Level 3 | Level 4     | Not observed |
| Please comment on why you have given yourself this rating                                                                                                                                                                                                                                                                                                                                                                                                        |         |         |             |              |
| <b>13. Dealing with ethico-legal issues</b>                                                                                                                                                                                                                                                                                                                                                                                                                      |         |         |             |              |
| <ul style="list-style-type: none"> <li>• demonstrates behaviour with regard to professional regulatory bodies</li> <li>• remains up to date and fit to practise</li> <li>• demonstrates ability to offer apology or explanation when appropriate</li> <li>• understands the safeguarding of vulnerable groups</li> <li>• demonstrates ability to lead the clinical team in ensuring that medical legal factors are considered openly and consistently</li> </ul> |         |         |             |              |
| Level achieved                                                                                                                                                                                                                                                                                                                                                                                                                                                   | Level 2 | Level 3 | Level 4     | Not observed |
| Please comment on why you have given yourself this rating                                                                                                                                                                                                                                                                                                                                                                                                        |         |         |             |              |
| <b>14. Working with NHS systems</b>                                                                                                                                                                                                                                                                                                                                                                                                                              |         |         |             |              |
| <ul style="list-style-type: none"> <li>• demonstrates behaviour appropriately with regard to managers and to management requests</li> <li>• demonstrates ability to respond appropriately to complaints</li> <li>• demonstrates effective clinical leadership</li> <li>• demonstrates promotion of an open and transparent culture</li> </ul>                                                                                                                    |         |         |             |              |
| Level achieved                                                                                                                                                                                                                                                                                                                                                                                                                                                   | Level 2 | Level 3 | Level 4     | Not observed |
| Please comment on why you have given yourself this rating                                                                                                                                                                                                                                                                                                                                                                                                        |         |         |             |              |
| <b>Any further comments</b>                                                                                                                                                                                                                                                                                                                                                                                                                                      |         |         |             |              |
| <b>Signed:</b>                                                                                                                                                                                                                                                                                                                                                                                                                                                   |         |         | <b>Date</b> |              |



---

## CiP Study Clinical Supervisor Report Form

**FOR USE IN PATHFINDER ONLY**

|                                     |  |
|-------------------------------------|--|
| <b>Trainee Name</b>                 |  |
| <b>Trainee GMC number</b>           |  |
| <b>Specialty Training Programme</b> |  |
| <b>Specialty (IF CMT)</b>           |  |
| <b>Trainee Post Year</b>            |  |
| <b>Supervisor Name</b>              |  |

### Guidance notes

This form should be used to rate the above trainee's progress against the 14 internal medicine competencies in practice (CiPs) that we expect all doctors to have demonstrated and be 'trusted' to be able to undertake by the time they complete their CCT. You should record the level the trainee is performing at for each of the 14 CiPs. Please note there are separate descriptors for the clinical CiPs (1-9) and non-clinical CiPs (10-14).

Please refer to the participant guidance and supporting materials for details, including when each level is likely to be achieved for a CiP.

You should only assign a level for CiPs that you have directly observed.

---

### CiPs 1-9

CiPs 1-9 are clinical in nature and the following level descriptors apply:

- Level 1: Observations of the activity – no execution (expected at Foundation level)
- Level 2: Trusted to act with direct supervision
- Level 3: Trusted to act with supervision available quickly
- Level 4: Trusted to act unsupervised (with clinical oversight within training)

|                                                                                                                                                                                                                                                                                                                  |
|------------------------------------------------------------------------------------------------------------------------------------------------------------------------------------------------------------------------------------------------------------------------------------------------------------------|
| <b>1. Managing an acute unselected take</b>                                                                                                                                                                                                                                                                      |
| <ul style="list-style-type: none"><li>○ demonstrates behaviour appropriately with regard to patients</li><li>○ demonstrates behaviour appropriately with regard to clinical and other professional colleagues</li><li>○ demonstrates effective consultation skills including challenging circumstances</li></ul> |



|                                                                                                                                                                                                                                                                                                                                                                                                                                                                                                                                                                                                                                                                                                                                                                                                                       |         |         |         |              |
|-----------------------------------------------------------------------------------------------------------------------------------------------------------------------------------------------------------------------------------------------------------------------------------------------------------------------------------------------------------------------------------------------------------------------------------------------------------------------------------------------------------------------------------------------------------------------------------------------------------------------------------------------------------------------------------------------------------------------------------------------------------------------------------------------------------------------|---------|---------|---------|--------------|
| <ul style="list-style-type: none"> <li>○ demonstrates ability to negotiate shared decision making</li> <li>○ demonstrates effective clinical leadership</li> <li>○ accurate diagnosis of patients presenting on an acute unselected take over a standard shift</li> <li>○ appropriate management of acute problems in patients presenting on an acute unselected take over a standard shift</li> <li>○ appropriate liaison with specialty services when required</li> </ul>                                                                                                                                                                                                                                                                                                                                           |         |         |         |              |
| Level achieved                                                                                                                                                                                                                                                                                                                                                                                                                                                                                                                                                                                                                                                                                                                                                                                                        | Level 2 | Level 3 | Level 4 | Not observed |
| Comments (please include the evidence you have used to make this decision)                                                                                                                                                                                                                                                                                                                                                                                                                                                                                                                                                                                                                                                                                                                                            |         |         |         |              |
| <b>2. Managing an acute specialty-related take</b>                                                                                                                                                                                                                                                                                                                                                                                                                                                                                                                                                                                                                                                                                                                                                                    |         |         |         |              |
| <ul style="list-style-type: none"> <li>• demonstrates behaviour appropriately with regard to patients</li> <li>• demonstrates behaviour appropriately with regard to clinical and other professional colleagues</li> <li>• demonstrates effective consultation skills including challenging circumstances</li> <li>• demonstrates ability to negotiate shared decision making</li> <li>• demonstrates effective clinical leadership</li> <li>• appropriate continuing management of acute medical illness in patients admitted to hospital on an acute unselected take or selected take</li> </ul>                                                                                                                                                                                                                    |         |         |         |              |
| Level achieved                                                                                                                                                                                                                                                                                                                                                                                                                                                                                                                                                                                                                                                                                                                                                                                                        | Level 2 | Level 3 | Level 4 | Not observed |
| Comments (please include the evidence you have used to make this decision)                                                                                                                                                                                                                                                                                                                                                                                                                                                                                                                                                                                                                                                                                                                                            |         |         |         |              |
| <b>3. Providing continuity of care to medical inpatients</b>                                                                                                                                                                                                                                                                                                                                                                                                                                                                                                                                                                                                                                                                                                                                                          |         |         |         |              |
| <ul style="list-style-type: none"> <li>• demonstrates behaviour appropriately with regard to patients</li> <li>• demonstrates behaviour appropriately with regard to clinical and other professional colleagues</li> <li>• demonstrates effective consultation skills including challenging circumstances</li> <li>• identifies and manages barriers to communication (eg cognitive impairment, speech and hearing problems, capacity issues)</li> <li>• demonstrates ability to negotiate shared decision making</li> <li>• appropriate liaison with other specialty services when required</li> <li>• appropriate management of comorbidities in medial inpatients (unselected take, selected acute take or specialty admissions)</li> <li>• demonstrates awareness of the quality of patient experience</li> </ul> |         |         |         |              |
| Level achieved                                                                                                                                                                                                                                                                                                                                                                                                                                                                                                                                                                                                                                                                                                                                                                                                        | Level 2 | Level 3 | Level 4 | Not observed |



|                                                                                                                                                                                                                                                                                                                                                                                                                                                                                                                                                                                                                                                                                                 |         |         |         |              |
|-------------------------------------------------------------------------------------------------------------------------------------------------------------------------------------------------------------------------------------------------------------------------------------------------------------------------------------------------------------------------------------------------------------------------------------------------------------------------------------------------------------------------------------------------------------------------------------------------------------------------------------------------------------------------------------------------|---------|---------|---------|--------------|
| Comments (please include the evidence you have used to make this decision)                                                                                                                                                                                                                                                                                                                                                                                                                                                                                                                                                                                                                      |         |         |         |              |
| <b>4. Managing outpatients with long term conditions</b>                                                                                                                                                                                                                                                                                                                                                                                                                                                                                                                                                                                                                                        |         |         |         |              |
| <ul style="list-style-type: none"> <li>demonstrates behaviour appropriately with regard to patients</li> <li>demonstrates behaviour appropriately with regard to clinical and other professional colleagues</li> <li>demonstrates effective consultation skills including challenging circumstances</li> <li>accurate diagnosis and appropriate comprehensive management of patients referred to an outpatient clinic, ambulatory or community setting</li> <li>appropriate management of comorbidities in an outpatient clinic</li> <li>appropriate management of comorbidities in ambulatory or community setting</li> </ul>                                                                  |         |         |         |              |
| Level achieved                                                                                                                                                                                                                                                                                                                                                                                                                                                                                                                                                                                                                                                                                  | Level 2 | Level 3 | Level 4 | Not observed |
| Comments (please include the evidence you have used to make this decision)                                                                                                                                                                                                                                                                                                                                                                                                                                                                                                                                                                                                                      |         |         |         |              |
| <b>5. Managing medical problems in patients in other specialties and special cases</b>                                                                                                                                                                                                                                                                                                                                                                                                                                                                                                                                                                                                          |         |         |         |              |
| <ul style="list-style-type: none"> <li>demonstrates effective consultation skills including challenging circumstances</li> <li>management of medical problems in inpatients under the care of other specialties</li> <li>appropriate and timely liaison with other medical specialty services when required</li> </ul>                                                                                                                                                                                                                                                                                                                                                                          |         |         |         |              |
| Level achieved                                                                                                                                                                                                                                                                                                                                                                                                                                                                                                                                                                                                                                                                                  | Level 2 | Level 3 | Level 4 | Not observed |
| Comments (please include the evidence you have used to make this decision)                                                                                                                                                                                                                                                                                                                                                                                                                                                                                                                                                                                                                      |         |         |         |              |
| <b>6. Managing an MDT including discharge planning</b>                                                                                                                                                                                                                                                                                                                                                                                                                                                                                                                                                                                                                                          |         |         |         |              |
| <ul style="list-style-type: none"> <li>demonstrates behaviour appropriately with regard to patients</li> <li>demonstrates behaviour appropriately with regard to clinical and other professional colleagues</li> <li>demonstrates effective consultation skills including challenging circumstances</li> <li>demonstrates effective clinical leadership</li> <li>demonstrates ability to work well in a multi-disciplinary team, in all relevant roles</li> <li>Effectively estimates length of stay</li> <li>Identifies appropriate discharge plan</li> <li>Recognise the importance of prompt and accurate information sharing with primary care team following hospital discharge</li> </ul> |         |         |         |              |

|                                                                                                                                                                                                                                                                                                                                                                                                                               |         |         |         |              |
|-------------------------------------------------------------------------------------------------------------------------------------------------------------------------------------------------------------------------------------------------------------------------------------------------------------------------------------------------------------------------------------------------------------------------------|---------|---------|---------|--------------|
| Level achieved                                                                                                                                                                                                                                                                                                                                                                                                                | Level 2 | Level 3 | Level 4 | Not observed |
| Comments (please include the evidence you have used to make this decision)                                                                                                                                                                                                                                                                                                                                                    |         |         |         |              |
| <b>7. Delivering effective resuscitation and managing the deteriorating patient</b>                                                                                                                                                                                                                                                                                                                                           |         |         |         |              |
| <ul style="list-style-type: none"> <li>• competence in assessment and resuscitation</li> <li>• able to promptly assess the acutely deteriorating patient, including those who are shocked or unconscious</li> <li>• effective participation in decision making with regard to resuscitation decisions</li> </ul>                                                                                                              |         |         |         |              |
| Level achieved                                                                                                                                                                                                                                                                                                                                                                                                                | Level 2 | Level 3 | Level 4 | Not observed |
| Comments (please include the evidence you have used to make this decision)                                                                                                                                                                                                                                                                                                                                                    |         |         |         |              |
| <b>8. Managing end of life and palliative care skills</b>                                                                                                                                                                                                                                                                                                                                                                     |         |         |         |              |
| <ul style="list-style-type: none"> <li>• demonstrates behaviour appropriately with regard to patients</li> <li>• demonstrates behaviour appropriately with regard to clinical and other professional colleagues</li> <li>• demonstrates effective consultation skills including challenging circumstances</li> <li>• delivers appropriate palliative care and end of life care</li> </ul>                                     |         |         |         |              |
| Level achieved                                                                                                                                                                                                                                                                                                                                                                                                                | Level 2 | Level 3 | Level 4 | Not observed |
| Comments (please include the evidence you have used to make this decision)                                                                                                                                                                                                                                                                                                                                                    |         |         |         |              |
| <b>9. Achieving procedural skills</b>                                                                                                                                                                                                                                                                                                                                                                                         |         |         |         |              |
| For procedures appropriate to the stage of training as defined in the CMT or GIM curriculum: <ul style="list-style-type: none"> <li>• Able to outline the indications for the procedures and take consent</li> <li>• Evidence of aseptic technique and safe use of analgesia and local anaesthetics</li> <li>• Evidence of safe learning in clinical skills lab/simulation before performing procedures clinically</li> </ul> |         |         |         |              |
| Level achieved                                                                                                                                                                                                                                                                                                                                                                                                                | Level 2 | Level 3 | Level 4 | Not observed |
| Comments (please include the evidence you have used to make this decision)                                                                                                                                                                                                                                                                                                                                                    |         |         |         |              |

|  |
|--|
|  |
|--|

## CiPs 10-14

CiPs 10-14 are non- clinical in nature and the following level descriptors apply:

- Level 1: No or limited knowledge or experience (expected at Foundation level)
- Level 2: Knowledge but limited experience, trusted to act with direct supervision
- Level 3: Knowledge and experience, trusted to act with guidance available
- Level 4: Experienced and trusted to level of independent practice

| <b>10. Delivering effective quality improvement in patient care</b>                                                                                                                                                                                                                                                                                                                                                                                                                       |         |         |         |              |
|-------------------------------------------------------------------------------------------------------------------------------------------------------------------------------------------------------------------------------------------------------------------------------------------------------------------------------------------------------------------------------------------------------------------------------------------------------------------------------------------|---------|---------|---------|--------------|
| <ul style="list-style-type: none"> <li>• raises concerns including errors, serious incidents and adverse events (including 'never events')</li> <li>• shares good practice appropriately</li> <li>• demonstrates the delivery of quality improvement</li> </ul>                                                                                                                                                                                                                           |         |         |         |              |
| Level achieved                                                                                                                                                                                                                                                                                                                                                                                                                                                                            | Level 2 | Level 3 | Level 4 | Not observed |
| Comments (please include the evidence you have used to make this decision)                                                                                                                                                                                                                                                                                                                                                                                                                |         |         |         |              |
|                                                                                                                                                                                                                                                                                                                                                                                                                                                                                           |         |         |         |              |
| <b>11. Carrying out research and managing data appropriately</b>                                                                                                                                                                                                                                                                                                                                                                                                                          |         |         |         |              |
| <ul style="list-style-type: none"> <li>• demonstrates behaviour appropriately with regard to managing clinical information/data</li> <li>• demonstrates understanding of principles of research and academic writing</li> <li>• demonstrates ability to carry out critical appraisal of the literature</li> <li>• understanding of public health epidemiology and global health patterns</li> <li>• Follows guidelines on ethical conduct in research and consent for research</li> </ul> |         |         |         |              |
| Level achieved                                                                                                                                                                                                                                                                                                                                                                                                                                                                            | Level 2 | Level 3 | Level 4 | Not observed |
| Comments (please include the evidence you have used to make this decision)                                                                                                                                                                                                                                                                                                                                                                                                                |         |         |         |              |
|                                                                                                                                                                                                                                                                                                                                                                                                                                                                                           |         |         |         |              |
| <b>12. Acting as a clinical teacher and clinical supervisor</b>                                                                                                                                                                                                                                                                                                                                                                                                                           |         |         |         |              |

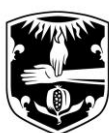

|                                                                                                                                                                                                                                                                                                                                                                                                                                                                                                                                                                                                          |         |         |         |              |
|----------------------------------------------------------------------------------------------------------------------------------------------------------------------------------------------------------------------------------------------------------------------------------------------------------------------------------------------------------------------------------------------------------------------------------------------------------------------------------------------------------------------------------------------------------------------------------------------------------|---------|---------|---------|--------------|
| <ul style="list-style-type: none"> <li>• ability and experience of teaching and training medical students, junior doctors and other health care professionals including: delivering teaching and training sessions, effective assessment of performance and giving effective feedback</li> <li>• able to supervise less experienced trainees in their clinical assessment and management of patients</li> <li>• able to supervise less experienced trainees in carrying out appropriate practical procedures</li> <li>• able to act a Clinical Supervisor to the standard required by the GMC</li> </ul> |         |         |         |              |
| Level achieved                                                                                                                                                                                                                                                                                                                                                                                                                                                                                                                                                                                           | Level 2 | Level 3 | Level 4 | Not observed |
| Comments (please include the evidence you have used to make this decision)                                                                                                                                                                                                                                                                                                                                                                                                                                                                                                                               |         |         |         |              |
| <b>13. Dealing with ethico-legal issues</b>                                                                                                                                                                                                                                                                                                                                                                                                                                                                                                                                                              |         |         |         |              |
| <ul style="list-style-type: none"> <li>• demonstrates behaviour with regard to professional regulatory bodies</li> <li>• remains up to date and fit to practise</li> <li>• demonstrates ability to offer apology or explanation when appropriate</li> <li>• understands the safeguarding of vulnerable groups</li> <li>• demonstrates ability to lead the clinical team in ensuring that medical legal factors are considered openly and consistently</li> </ul>                                                                                                                                         |         |         |         |              |
| Level achieved                                                                                                                                                                                                                                                                                                                                                                                                                                                                                                                                                                                           | Level 2 | Level 3 | Level 4 | Not observed |
| Comments (please include the evidence you have used to make this decision)                                                                                                                                                                                                                                                                                                                                                                                                                                                                                                                               |         |         |         |              |
| <b>14. Working with NHS systems</b>                                                                                                                                                                                                                                                                                                                                                                                                                                                                                                                                                                      |         |         |         |              |
| <ul style="list-style-type: none"> <li>• demonstrates behaviour appropriately with regard to managers and to management requests</li> <li>• demonstrates ability to respond appropriately to complaints</li> <li>• demonstrates effective clinical leadership</li> <li>• demonstrates promotion of an open and transparent culture</li> </ul>                                                                                                                                                                                                                                                            |         |         |         |              |
| Level achieved                                                                                                                                                                                                                                                                                                                                                                                                                                                                                                                                                                                           | Level 2 | Level 3 | Level 4 | Not observed |
| Comments (please include the evidence you have used to make this decision)                                                                                                                                                                                                                                                                                                                                                                                                                                                                                                                               |         |         |         |              |

|                                                                                       |      |
|---------------------------------------------------------------------------------------|------|
|                                                                                       |      |
| What evidence did you consider when making judgement about the trainee's performance? |      |
| Any further comments                                                                  |      |
| Signed:                                                                               | Date |

## CiP Study Educational Supervisor Report Form

FOR USE IN PATHFINDER ONLY

|                              |  |
|------------------------------|--|
| Trainee Name                 |  |
| Trainee GMC number           |  |
| Specialty Training Programme |  |
| Specialty (IF CMT)           |  |
| Trainee Post Year            |  |
| Supervisor Name              |  |

### Guidance notes

This form should be used to rate the above trainee's progress against the 14 internal medicine competencies in practice (CiPs) that we expect all doctors to have demonstrated and be 'trusted' to be able to undertake by the time they complete their CCT. You should record the level the trainee is performing at for each of the 14 CiPs. Please note there are separate descriptors for the clinical CiPs (1-9) and non-clinical CiPs (10-14).

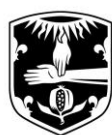

Please refer to the participant guidance and supporting materials for details, including when each level is likely to be achieved for a CiP. It would be quite usual for trainees to achieve a 3 or a 4 earlier than predicted in this guidance, however any trainee achieving a 3 or 4 later than predicted would normally have specific developmental requirements and these should be listed in the relevant comments box.

You should only assign a level for CiPs where there is sufficient evidence for you to make a judgement.

## CiPs 1-9

CiPs 1-9 are clinical in nature and the following level descriptors apply:

- Level 1: Observations of the activity – no execution (expected at Foundation level)
- Level 2: Trusted to act with direct supervision
- Level 3: Trusted to act with supervision available quickly
- Level 4: Trusted to act unsupervised (with clinical oversight within training)

| 1. Managing an acute unselected take                                                                                                                                                                                                                                                                                                                                                                                                                                                                                                                                                                                                                                                                                                                    |         |                         |         |                       |
|---------------------------------------------------------------------------------------------------------------------------------------------------------------------------------------------------------------------------------------------------------------------------------------------------------------------------------------------------------------------------------------------------------------------------------------------------------------------------------------------------------------------------------------------------------------------------------------------------------------------------------------------------------------------------------------------------------------------------------------------------------|---------|-------------------------|---------|-----------------------|
| <ul style="list-style-type: none"> <li>○ demonstrates behaviour appropriately with regard to patients</li> <li>○ demonstrates behaviour appropriately with regard to clinical and other professional colleagues</li> <li>○ demonstrates effective consultation skills including challenging circumstances</li> <li>○ demonstrates ability to negotiate shared decision making</li> <li>○ demonstrates effective clinical leadership</li> <li>○ accurate diagnosis of patients presenting on an acute unselected take over a standard shift</li> <li>○ appropriate management of acute problems in patients presenting on an acute unselected take over a standard shift</li> <li>○ appropriate liaison with specialty services when required</li> </ul> |         |                         |         |                       |
| Level achieved                                                                                                                                                                                                                                                                                                                                                                                                                                                                                                                                                                                                                                                                                                                                          | Level 2 | Level 3                 | Level 4 | Insufficient evidence |
| If you have selected insufficient evidence, please provide further details                                                                                                                                                                                                                                                                                                                                                                                                                                                                                                                                                                                                                                                                              |         |                         |         |                       |
| Evidence seen (please tick all that apply)                                                                                                                                                                                                                                                                                                                                                                                                                                                                                                                                                                                                                                                                                                              |         |                         |         |                       |
| CiP Study Clinical Supervisor Report                                                                                                                                                                                                                                                                                                                                                                                                                                                                                                                                                                                                                                                                                                                    |         | MSF                     |         |                       |
| CbD                                                                                                                                                                                                                                                                                                                                                                                                                                                                                                                                                                                                                                                                                                                                                     |         | ACAT                    |         |                       |
| Logbook                                                                                                                                                                                                                                                                                                                                                                                                                                                                                                                                                                                                                                                                                                                                                 |         | Other (please specify): |         |                       |
| 2. Managing an acute specialty-related take                                                                                                                                                                                                                                                                                                                                                                                                                                                                                                                                                                                                                                                                                                             |         |                         |         |                       |

|                                                                                                                                                                                                                                                                                                                                                                                                                                                                                                                                                                                                                                                                                                                                                                                                                       |         |                         |         |                       |
|-----------------------------------------------------------------------------------------------------------------------------------------------------------------------------------------------------------------------------------------------------------------------------------------------------------------------------------------------------------------------------------------------------------------------------------------------------------------------------------------------------------------------------------------------------------------------------------------------------------------------------------------------------------------------------------------------------------------------------------------------------------------------------------------------------------------------|---------|-------------------------|---------|-----------------------|
| <ul style="list-style-type: none"> <li>• demonstrates behaviour appropriately with regard to patients</li> <li>• demonstrates behaviour appropriately with regard to clinical and other professional colleagues</li> <li>• demonstrates effective consultation skills including challenging circumstances</li> <li>• demonstrates ability to negotiate shared decision making</li> <li>• demonstrates effective clinical leadership</li> <li>• appropriate continuing management of acute medical illness in patients admitted to hospital on an acute unselected take or selected take</li> </ul>                                                                                                                                                                                                                    |         |                         |         |                       |
| Level achieved                                                                                                                                                                                                                                                                                                                                                                                                                                                                                                                                                                                                                                                                                                                                                                                                        | Level 2 | Level 3                 | Level 4 | Insufficient evidence |
| If you have selected insufficient evidence, please provide further details                                                                                                                                                                                                                                                                                                                                                                                                                                                                                                                                                                                                                                                                                                                                            |         |                         |         |                       |
| Evidence seen (please tick all that apply)                                                                                                                                                                                                                                                                                                                                                                                                                                                                                                                                                                                                                                                                                                                                                                            |         |                         |         |                       |
| CiP Study Clinical Supervisor Report                                                                                                                                                                                                                                                                                                                                                                                                                                                                                                                                                                                                                                                                                                                                                                                  |         | MSF                     |         |                       |
| CbD                                                                                                                                                                                                                                                                                                                                                                                                                                                                                                                                                                                                                                                                                                                                                                                                                   |         | ACAT                    |         |                       |
| Logbook                                                                                                                                                                                                                                                                                                                                                                                                                                                                                                                                                                                                                                                                                                                                                                                                               |         | Other (please specify): |         |                       |
| <b>3. Providing continuity of care to medical inpatients</b>                                                                                                                                                                                                                                                                                                                                                                                                                                                                                                                                                                                                                                                                                                                                                          |         |                         |         |                       |
| <ul style="list-style-type: none"> <li>• demonstrates behaviour appropriately with regard to patients</li> <li>• demonstrates behaviour appropriately with regard to clinical and other professional colleagues</li> <li>• demonstrates effective consultation skills including challenging circumstances</li> <li>• identifies and manages barriers to communication (eg cognitive impairment, speech and hearing problems, capacity issues)</li> <li>• demonstrates ability to negotiate shared decision making</li> <li>• appropriate liaison with other specialty services when required</li> <li>• appropriate management of comorbidities in medial inpatients (unselected take, selected acute take or specialty admissions)</li> <li>• demonstrates awareness of the quality of patient experience</li> </ul> |         |                         |         |                       |
| Level achieved                                                                                                                                                                                                                                                                                                                                                                                                                                                                                                                                                                                                                                                                                                                                                                                                        | Level 2 | Level 3                 | Level 4 | Insufficient evidence |
| If you have selected insufficient evidence, please provide further details                                                                                                                                                                                                                                                                                                                                                                                                                                                                                                                                                                                                                                                                                                                                            |         |                         |         |                       |
| Evidence seen (please tick all that apply)                                                                                                                                                                                                                                                                                                                                                                                                                                                                                                                                                                                                                                                                                                                                                                            |         |                         |         |                       |
| CiP Study Clinical Supervisor Report                                                                                                                                                                                                                                                                                                                                                                                                                                                                                                                                                                                                                                                                                                                                                                                  |         | MSF                     |         |                       |
| ACAT                                                                                                                                                                                                                                                                                                                                                                                                                                                                                                                                                                                                                                                                                                                                                                                                                  |         | Mini-CEX                |         |                       |

|                                                                                                                                                                                                                                                                                                                                                                                                                                                                                                                                                                                                                                            |         |                |         |                       |
|--------------------------------------------------------------------------------------------------------------------------------------------------------------------------------------------------------------------------------------------------------------------------------------------------------------------------------------------------------------------------------------------------------------------------------------------------------------------------------------------------------------------------------------------------------------------------------------------------------------------------------------------|---------|----------------|---------|-----------------------|
| DOPS                                                                                                                                                                                                                                                                                                                                                                                                                                                                                                                                                                                                                                       |         | MRCP(UK)       |         |                       |
| Other (please specify):                                                                                                                                                                                                                                                                                                                                                                                                                                                                                                                                                                                                                    |         |                |         |                       |
| <b>4. Managing outpatients with long term conditions</b>                                                                                                                                                                                                                                                                                                                                                                                                                                                                                                                                                                                   |         |                |         |                       |
| <ul style="list-style-type: none"> <li>• demonstrates behaviour appropriately with regard to patients</li> <li>• demonstrates behaviour appropriately with regard to clinical and other professional colleagues</li> <li>• demonstrates effective consultation skills including challenging circumstances</li> <li>• accurate diagnosis and appropriate comprehensive management of patients referred to an outpatient clinic, ambulatory or community setting</li> <li>• appropriate management of comorbidities in an outpatient clinic</li> <li>• appropriate management of comorbidities in ambulatory or community setting</li> </ul> |         |                |         |                       |
| Level achieved                                                                                                                                                                                                                                                                                                                                                                                                                                                                                                                                                                                                                             | Level 2 | Level 3        | Level 4 | Insufficient evidence |
| If you have selected insufficient evidence, please provide further details                                                                                                                                                                                                                                                                                                                                                                                                                                                                                                                                                                 |         |                |         |                       |
| Evidence seen (please tick all that apply)                                                                                                                                                                                                                                                                                                                                                                                                                                                                                                                                                                                                 |         |                |         |                       |
| CiP Study Clinical Supervisor Report                                                                                                                                                                                                                                                                                                                                                                                                                                                                                                                                                                                                       |         | Patient Survey |         |                       |
| ACAT                                                                                                                                                                                                                                                                                                                                                                                                                                                                                                                                                                                                                                       |         | Mini-CEX       |         |                       |
| Other (please specify):                                                                                                                                                                                                                                                                                                                                                                                                                                                                                                                                                                                                                    |         |                |         |                       |
| <b>5. Managing medical problems in patients in other specialties and special cases</b>                                                                                                                                                                                                                                                                                                                                                                                                                                                                                                                                                     |         |                |         |                       |
| <ul style="list-style-type: none"> <li>• demonstrates effective consultation skills including challenging circumstances</li> <li>• management of medical problems in inpatients under the care of other specialties</li> <li>• appropriate and timely liaison with other medical specialty services when required</li> </ul>                                                                                                                                                                                                                                                                                                               |         |                |         |                       |
| Level achieved                                                                                                                                                                                                                                                                                                                                                                                                                                                                                                                                                                                                                             | Level 2 | Level 3        | Level 4 | Insufficient evidence |
| If you have selected insufficient evidence, please provide further details                                                                                                                                                                                                                                                                                                                                                                                                                                                                                                                                                                 |         |                |         |                       |
| Evidence seen (please tick all that apply)                                                                                                                                                                                                                                                                                                                                                                                                                                                                                                                                                                                                 |         |                |         |                       |
| CiP Study Clinical Supervisor Report                                                                                                                                                                                                                                                                                                                                                                                                                                                                                                                                                                                                       |         | CbD            |         |                       |
| ACAT                                                                                                                                                                                                                                                                                                                                                                                                                                                                                                                                                                                                                                       |         | MRCP(UK)       |         |                       |
| Other (please specify):                                                                                                                                                                                                                                                                                                                                                                                                                                                                                                                                                                                                                    |         |                |         |                       |



|                                                                                                                                                                                                                                                                                                                                                                                                                                                                                                                                                                                                                                                                                                                 |         |                         |         |                       |
|-----------------------------------------------------------------------------------------------------------------------------------------------------------------------------------------------------------------------------------------------------------------------------------------------------------------------------------------------------------------------------------------------------------------------------------------------------------------------------------------------------------------------------------------------------------------------------------------------------------------------------------------------------------------------------------------------------------------|---------|-------------------------|---------|-----------------------|
| <b>6. Managing an MDT including discharge planning</b>                                                                                                                                                                                                                                                                                                                                                                                                                                                                                                                                                                                                                                                          |         |                         |         |                       |
| <ul style="list-style-type: none"> <li>• demonstrates behaviour appropriately with regard to patients</li> <li>• demonstrates behaviour appropriately with regard to clinical and other professional colleagues</li> <li>• demonstrates effective consultation skills including challenging circumstances</li> <li>• demonstrates effective clinical leadership</li> <li>• demonstrates ability to work well in a multi-disciplinary team, in all relevant roles</li> <li>• Effectively estimates length of stay</li> <li>• Identifies appropriate discharge plan</li> <li>• Recognise the importance of prompt and accurate information sharing with primary care team following hospital discharge</li> </ul> |         |                         |         |                       |
| Level achieved                                                                                                                                                                                                                                                                                                                                                                                                                                                                                                                                                                                                                                                                                                  | Level 2 | Level 3                 | Level 4 | Insufficient evidence |
| If you have selected insufficient evidence, please provide further details                                                                                                                                                                                                                                                                                                                                                                                                                                                                                                                                                                                                                                      |         |                         |         |                       |
| Evidence seen (please tick all that apply)                                                                                                                                                                                                                                                                                                                                                                                                                                                                                                                                                                                                                                                                      |         |                         |         |                       |
| CiP Study Clinical Supervisor Report                                                                                                                                                                                                                                                                                                                                                                                                                                                                                                                                                                                                                                                                            |         | MSF                     |         |                       |
| ACAT                                                                                                                                                                                                                                                                                                                                                                                                                                                                                                                                                                                                                                                                                                            |         | Other (please specify): |         |                       |
| <b>7. Delivering effective resuscitation and managing the deteriorating patient</b>                                                                                                                                                                                                                                                                                                                                                                                                                                                                                                                                                                                                                             |         |                         |         |                       |
| <ul style="list-style-type: none"> <li>• competence in assessment and resuscitation</li> <li>• able to promptly assess the acutely deteriorating patient, including those who are shocked or unconscious</li> <li>• effective participation in decision making with regard to resuscitation decisions</li> </ul>                                                                                                                                                                                                                                                                                                                                                                                                |         |                         |         |                       |
| Level achieved                                                                                                                                                                                                                                                                                                                                                                                                                                                                                                                                                                                                                                                                                                  | Level 2 | Level 3                 | Level 4 | Insufficient evidence |
| If you have selected insufficient evidence, please provide further details                                                                                                                                                                                                                                                                                                                                                                                                                                                                                                                                                                                                                                      |         |                         |         |                       |
| Evidence seen (please tick all that apply)                                                                                                                                                                                                                                                                                                                                                                                                                                                                                                                                                                                                                                                                      |         |                         |         |                       |
| CiP Study Clinical Supervisor Report                                                                                                                                                                                                                                                                                                                                                                                                                                                                                                                                                                                                                                                                            |         | MSF                     |         |                       |
| ACAT                                                                                                                                                                                                                                                                                                                                                                                                                                                                                                                                                                                                                                                                                                            |         | DOPS                    |         |                       |
| ALS                                                                                                                                                                                                                                                                                                                                                                                                                                                                                                                                                                                                                                                                                                             |         | Logbook                 |         |                       |
| Other (please specify):                                                                                                                                                                                                                                                                                                                                                                                                                                                                                                                                                                                                                                                                                         |         |                         |         |                       |
| <b>8. Managing end of life and palliative care skills</b>                                                                                                                                                                                                                                                                                                                                                                                                                                                                                                                                                                                                                                                       |         |                         |         |                       |

|                                                                                                                                                                                                                                                                                                                                                                                           |         |                         |         |                       |
|-------------------------------------------------------------------------------------------------------------------------------------------------------------------------------------------------------------------------------------------------------------------------------------------------------------------------------------------------------------------------------------------|---------|-------------------------|---------|-----------------------|
| <ul style="list-style-type: none"> <li>• demonstrates behaviour appropriately with regard to patients</li> <li>• demonstrates behaviour appropriately with regard to clinical and other professional colleagues</li> <li>• demonstrates effective consultation skills including challenging circumstances</li> <li>• delivers appropriate palliative care and end of life care</li> </ul> |         |                         |         |                       |
| Level achieved                                                                                                                                                                                                                                                                                                                                                                            | Level 2 | Level 3                 | Level 4 | Insufficient evidence |
| If you have selected insufficient evidence, please provide further details                                                                                                                                                                                                                                                                                                                |         |                         |         |                       |
| Evidence seen (please tick all that apply)                                                                                                                                                                                                                                                                                                                                                |         |                         |         |                       |
| CiP Study Clinical Supervisor Report                                                                                                                                                                                                                                                                                                                                                      |         | CbD                     |         |                       |
| Mini-CEX                                                                                                                                                                                                                                                                                                                                                                                  |         | MSF                     |         |                       |
| MRCP(UK)                                                                                                                                                                                                                                                                                                                                                                                  |         | Other (please specify): |         |                       |
| <b>9. Achieving procedural skills</b>                                                                                                                                                                                                                                                                                                                                                     |         |                         |         |                       |
| For procedures appropriate to the stage of training as defined in the CMT or GIM curriculum:                                                                                                                                                                                                                                                                                              |         |                         |         |                       |
| <ul style="list-style-type: none"> <li>• Able to outline the indications for the procedures and take consent</li> <li>• Evidence of aseptic technique and safe use of analgesia and local anaesthetics</li> <li>• Evidence of safe learning in clinical skills lab/simulation before performing procedures clinically</li> </ul>                                                          |         |                         |         |                       |
| Level achieved                                                                                                                                                                                                                                                                                                                                                                            | Level 2 | Level 3                 | Level 4 | Insufficient evidence |
| If you have selected insufficient evidence, please provide further details                                                                                                                                                                                                                                                                                                                |         |                         |         |                       |
| Evidence seen (please tick all that apply)                                                                                                                                                                                                                                                                                                                                                |         |                         |         |                       |
| CiP Study Clinical Supervisor Report                                                                                                                                                                                                                                                                                                                                                      |         | DOPS                    |         |                       |
| Other (please specify):                                                                                                                                                                                                                                                                                                                                                                   |         |                         |         |                       |

## CiPs 10-14

CiPs 10-14 are non- clinical in nature and the following level descriptors apply:

- Level 1: No or limited knowledge or experience (expected at Foundation level)



- Level 2: Knowledge but limited experience, trusted to act with direct supervision
- Level 3: Knowledge and experience, trusted to act with guidance available
- Level 4: Experienced and trusted to level of independent practice

| 10. Delivering effective quality improvement in patient care                                                                                                                                                                                                                                                                                                                                                                                                                              |         |                 |         |                       |
|-------------------------------------------------------------------------------------------------------------------------------------------------------------------------------------------------------------------------------------------------------------------------------------------------------------------------------------------------------------------------------------------------------------------------------------------------------------------------------------------|---------|-----------------|---------|-----------------------|
| <ul style="list-style-type: none"> <li>• raises concerns including errors, serious incidents and adverse events (including 'never events')</li> <li>• shares good practice appropriately</li> <li>• demonstrates the delivery of quality improvement</li> </ul>                                                                                                                                                                                                                           |         |                 |         |                       |
| Level achieved                                                                                                                                                                                                                                                                                                                                                                                                                                                                            | Level 2 | Level 3         | Level 4 | Insufficient evidence |
| If you have selected insufficient evidence, please provide further details                                                                                                                                                                                                                                                                                                                                                                                                                |         |                 |         |                       |
| Evidence seen (please tick all that apply)                                                                                                                                                                                                                                                                                                                                                                                                                                                |         |                 |         |                       |
| CiP Study Clinical Supervisor Report                                                                                                                                                                                                                                                                                                                                                                                                                                                      |         | QIPAT/AA        |         |                       |
| CbD                                                                                                                                                                                                                                                                                                                                                                                                                                                                                       |         | Mini-CEX        |         |                       |
| MSF                                                                                                                                                                                                                                                                                                                                                                                                                                                                                       |         | TO              |         |                       |
| Other (please specify):                                                                                                                                                                                                                                                                                                                                                                                                                                                                   |         |                 |         |                       |
| 11. Carrying out research and managing data appropriately                                                                                                                                                                                                                                                                                                                                                                                                                                 |         |                 |         |                       |
| <ul style="list-style-type: none"> <li>• demonstrates behaviour appropriately with regard to managing clinical information/data</li> <li>• demonstrates understanding of principles of research and academic writing</li> <li>• demonstrates ability to carry out critical appraisal of the literature</li> <li>• understanding of public health epidemiology and global health patterns</li> <li>• Follows guidelines on ethical conduct in research and consent for research</li> </ul> |         |                 |         |                       |
| Level achieved                                                                                                                                                                                                                                                                                                                                                                                                                                                                            | Level 2 | Level 3         | Level 4 | Insufficient evidence |
| If you have selected insufficient evidence, please provide further details                                                                                                                                                                                                                                                                                                                                                                                                                |         |                 |         |                       |
| Evidence seen (please tick all that apply)                                                                                                                                                                                                                                                                                                                                                                                                                                                |         |                 |         |                       |
| CiP Study Clinical Supervisor Report                                                                                                                                                                                                                                                                                                                                                                                                                                                      |         | GCP certificate |         |                       |
| Other (please specify):                                                                                                                                                                                                                                                                                                                                                                                                                                                                   |         |                 |         |                       |



|                                                                                                                                                                                                                                                                                                                                                                                                                                                                                                                                                                                                          |         |                         |         |                       |
|----------------------------------------------------------------------------------------------------------------------------------------------------------------------------------------------------------------------------------------------------------------------------------------------------------------------------------------------------------------------------------------------------------------------------------------------------------------------------------------------------------------------------------------------------------------------------------------------------------|---------|-------------------------|---------|-----------------------|
|                                                                                                                                                                                                                                                                                                                                                                                                                                                                                                                                                                                                          |         |                         |         |                       |
| <b>12. Acting as a clinical teacher and clinical supervisor</b>                                                                                                                                                                                                                                                                                                                                                                                                                                                                                                                                          |         |                         |         |                       |
| <ul style="list-style-type: none"> <li>• ability and experience of teaching and training medical students, junior doctors and other health care professionals including: delivering teaching and training sessions, effective assessment of performance and giving effective feedback</li> <li>• able to supervise less experienced trainees in their clinical assessment and management of patients</li> <li>• able to supervise less experienced trainees in carrying out appropriate practical procedures</li> <li>• able to act a Clinical Supervisor to the standard required by the GMC</li> </ul> |         |                         |         |                       |
| Level achieved                                                                                                                                                                                                                                                                                                                                                                                                                                                                                                                                                                                           | Level 2 | Level 3                 | Level 4 | Insufficient evidence |
| If you have selected insufficient evidence, please provide further details                                                                                                                                                                                                                                                                                                                                                                                                                                                                                                                               |         |                         |         |                       |
| Evidence seen (please tick all that apply)                                                                                                                                                                                                                                                                                                                                                                                                                                                                                                                                                               |         |                         |         |                       |
| CiP Study Clinical Supervisor Report                                                                                                                                                                                                                                                                                                                                                                                                                                                                                                                                                                     |         | MSF                     |         |                       |
| TO                                                                                                                                                                                                                                                                                                                                                                                                                                                                                                                                                                                                       |         | Other (please specify): |         |                       |
| <b>13. Dealing with ethico-legal issues</b>                                                                                                                                                                                                                                                                                                                                                                                                                                                                                                                                                              |         |                         |         |                       |
| <ul style="list-style-type: none"> <li>• demonstrates behaviour with regard to professional regulatory bodies</li> <li>• remains up to date and fit to practise</li> <li>• demonstrates ability to offer apology or explanation when appropriate</li> <li>• understands the safeguarding of vulnerable groups</li> <li>• demonstrates ability to lead the clinical team in ensuring that medical legal factors are considered openly and consistently</li> </ul>                                                                                                                                         |         |                         |         |                       |
| Level achieved                                                                                                                                                                                                                                                                                                                                                                                                                                                                                                                                                                                           | Level 2 | Level 3                 | Level 4 | Insufficient evidence |
| If you have selected insufficient evidence, please provide further details                                                                                                                                                                                                                                                                                                                                                                                                                                                                                                                               |         |                         |         |                       |
| Evidence seen (please tick all that apply)                                                                                                                                                                                                                                                                                                                                                                                                                                                                                                                                                               |         |                         |         |                       |
| CiP Study Clinical Supervisor Report                                                                                                                                                                                                                                                                                                                                                                                                                                                                                                                                                                     |         | CbD                     |         |                       |
| DOPS                                                                                                                                                                                                                                                                                                                                                                                                                                                                                                                                                                                                     |         | Mini-CEX                |         |                       |
| MSF                                                                                                                                                                                                                                                                                                                                                                                                                                                                                                                                                                                                      |         | MRCP(UK)                |         |                       |

|                                                                                                                                                                                                                                                                                                                                               |         |          |         |                       |
|-----------------------------------------------------------------------------------------------------------------------------------------------------------------------------------------------------------------------------------------------------------------------------------------------------------------------------------------------|---------|----------|---------|-----------------------|
| Other (please specify):                                                                                                                                                                                                                                                                                                                       |         |          |         |                       |
| <b>14. Working with NHS systems</b>                                                                                                                                                                                                                                                                                                           |         |          |         |                       |
| <ul style="list-style-type: none"> <li>• demonstrates behaviour appropriately with regard to managers and to management requests</li> <li>• demonstrates ability to respond appropriately to complaints</li> <li>• demonstrates effective clinical leadership</li> <li>• demonstrates promotion of an open and transparent culture</li> </ul> |         |          |         |                       |
| Level achieved                                                                                                                                                                                                                                                                                                                                | Level 2 | Level 3  | Level 4 | Insufficient evidence |
| If you have selected insufficient evidence, please provide further details                                                                                                                                                                                                                                                                    |         |          |         |                       |
| Evidence seen (please tick all that apply)                                                                                                                                                                                                                                                                                                    |         |          |         |                       |
| CiP Study Clinical Supervisor Report                                                                                                                                                                                                                                                                                                          |         | QIPAT/AA |         |                       |
| MSF                                                                                                                                                                                                                                                                                                                                           |         | CbD      |         |                       |
| Other (please specify):                                                                                                                                                                                                                                                                                                                       |         |          |         |                       |
| What evidence did you consider when making judgement about the trainee's performance?                                                                                                                                                                                                                                                         |         |          |         |                       |
| Any further comments                                                                                                                                                                                                                                                                                                                          |         |          |         |                       |
| Signed:                                                                                                                                                                                                                                                                                                                                       |         |          | Date    |                       |



Supplement: Quraishi_Supplementary_S2_study_form.pdf [file Quraishi_Supplementary_S2_study_form.pdf]
